# Supplementary material for: Caspr3-Deficient Mice Exhibit Low Motor Learning during the Early Phase of the Accelerated Rotarod Task
Source: PLoS One. 2016 Jan 25;11(1):e0147887. doi: 10.1371/journal.pone.0147887 (PMC4726695; doi:10.1371/journal.pone.0147887)
Supplement: S5 Table — (XLSX) [file pone.0147887.s005.xlsx]

## Sheet: Wheel running test
Genotype	Rotations / 1h							Swings / 1h							Swings / 1,000 rotations							Swings / 1,000 rotations (% of day1)
	day1	day2	day3	day4	day5	day6		day1	day2	day3	day4	day5	day6		day1	day2	day3	day4	day5	day6		day1	day2	day3	day4	day5	day6
WT1	2603	4237	4660	5342	5664	5219		534	431	407	415	478	472		205.148	101.723	87.3391	77.6863	84.3927	90.4388		100	49.5852	42.5737	37.8684	41.1375	44.0847
WT2	3034	3681	4985	4904	4941	3870		433	202	371	407	402	285		142.716	54.8764	74.4233	82.9935	81.36	73.6434		100	38.4515	52.1479	58.1529	57.0084	51.6014
WT3	3007	3814	4527	4783	4848	4613		335	284	289	426	262	247		111.407	74.4625	63.8392	89.0654	54.0429	53.5443		100	66.8384	57.3028	79.9462	48.5096	48.062
WT4	3924	4173	4829	5016	4175	4038		329	473	516	323	232	255		83.843	113.348	106.854	64.3939	55.5689	63.1501		100	135.19	127.446	76.803	66.2773	75.3194
WT5	3129	3948	4764	5420	5460	5911		235	380	485	350	278	210		75.1039	96.2513	101.805	64.5756	50.9158	35.527		100	128.158	135.553	85.9818	67.7938	47.3038
WT6	3183	4762	4873	5319	5610	5038		352	433	348	362	219	190		110.587	90.9282	71.4139	68.0579	39.0374	37.7134		100	82.2228	64.5768	61.5421	35.3	34.1028
WT7	4492	5363	6245	6126	5439	5662		747	645	580	558	597	498		166.296	120.269	92.8743	91.0872	109.763	87.9548		100	72.3221	55.8489	54.7742	66.0046	52.8906
WT8	3666	4230	4724	5267	5121	4968		408	148	284	326	299	238		111.293	34.9882	60.1185	61.8948	58.387	47.9066		100	31.4379	54.0183	55.6143	52.4625	43.0455
WT9	3462	5416	6242	5772	5898	6567		556	300	296	342	254	240		160.601	55.3914	47.4207	59.2516	43.0654	36.5464		100	34.4901	29.5271	36.8937	26.8152	22.756
WT10	4503	4486	5808	5529	5820	5726		272	332	308	324	454	329		60.4042	74.008	53.0303	58.6001	78.0069	57.4572		100	122.521	87.7924	97.0133	129.142	95.1213
WT11	3541	3973	5337	5253	5603	5864		196	224	183	165	239	243		55.3516	56.3806	34.2889	31.4106	42.6557	41.4393		100	101.859	61.9475	56.7475	77.0632	74.8656
WT12	3871	3999	4484	4482	4664	4844		492	734	771	701	455	499		127.099	183.546	171.945	156.403	97.5557	103.014		100	144.412	135.284	123.056	76.7558	81.0503
WT13	4222	4899	4386	5587	5984	6568		437	202	137	244	285	189		103.505	41.2329	31.2358	43.6728	47.627	28.7759		100	39.8365	30.1779	42.1937	46.014	27.8013
WT14	3711	4776	5902	5437	6148	6600		272	213	154	212	143	229		73.2956	44.598	26.0928	38.9921	23.2596	34.697		100	60.8467	35.5995	53.1984	31.734	47.3384
KO1	4868	5466	5021	5730	5275	4859		423	478	564	609	397	700		86.894	87.4497	112.328	106.283	75.2607	144.063		100	100.64	129.27	122.313	86.612	165.791
KO2	4627	4130	4532	5264	6388	5951		487	389	454	323	454	410		105.252	94.1889	100.177	61.3602	71.0708	68.896		100	89.4891	95.178	58.2985	67.5245	65.4583
KO3	2501	3297	3835	3438	4560	4995		376	375	431	310	377	366		150.34	113.74	112.386	90.1687	82.6754	73.2733		100	75.6551	74.7546	59.9766	54.9924	48.7384
KO4	3281	3811	4485	4821	4903	5336		314	320	307	186	201	199		95.7025	83.9675	68.4504	38.5812	40.9953	37.2939		100	87.738	71.5241	40.3137	42.8362	38.9685
KO5	4203	5179	5922	6160	6671	6603		564	666	571	714	625	372		134.19	128.596	96.4201	115.909	93.6891	56.338		100	95.8316	71.8535	86.3769	69.8183	41.9838
KO6	2955	3628	4831	4576	4412	4763		230	293	381	354	361	249		77.8342	80.7607	78.8657	77.3601	81.8223	52.278		100	103.76	101.325	99.391	105.124	67.1658
KO7	3000	3894	5123	5480	5249	5287		237	293	409	233	264	134		79	75.244	79.836	42.5182	50.2953	25.3452		100	95.2455	101.058	53.8206	63.6649	32.0825
KO8	2447	5041	5752	5478	5151	5328		236	238	191	85	108	137		96.4446	47.2129	33.2058	15.5166	20.9668	25.7132		100	48.9533	34.43	16.0886	21.7397	26.6611
KO9	3629	5206	5620	5062	6688	6933		378	427	239	200	357	266		104.161	82.0207	42.5267	39.5101	53.3792	38.3672		100	78.7443	40.8279	37.9318	51.2468	36.8346
KO10	2309	4390	4714	5326	6710	6860		243	177	231	223	170	183		105.24	40.3189	49.003	41.8701	25.3353	26.6764		100	38.3113	46.5629	39.7852	24.0738	25.3481
KO11	3250	5443	5386	5478	5530	5875		369	665	520	361	287	288		113.538	122.175	96.5466	65.9	51.8987	49.0213		100	107.607	85.0343	58.042	45.7103	43.1759
KO12	3620	4604	5274	5658	5459	4959		205	203	185	236	197	158		56.6298	44.0921	35.0777	41.7109	36.0872	31.8613		100	77.8602	61.9422	73.6553	63.7247	56.2623
